# Supplementary material
Source: PubMed Central journal article supplement (PMC4426436)
Supplement: pnas.201423363SI.pdf [file pnas.201423363SI.pdf]

# Supporting Information

McLaughlin et al. 10.1073/pnas.1423363112

## SI Materials and Methods

**Laboratory-Based Tasks.** The peer evaluation task was adapted from a previously validated task used with children as young as age 4 y (1). The task began on a study visit before the physiological reactivity session. Participants were told that they would be playing a game to learn how children choose friends. They were then presented with 30 photographs of children along with brief profiles of each child including three pieces of information: favorite sport, favorite food, and favorite music/band/singer. Participants were told that they would have an opportunity to meet one of the other children in a subsequent visit and were asked to select the 10 children that they were most interested in meeting. Next, participants had their picture taken and provided information on their favorite sport, food, and music/band/singer for their profile. They were told that the other children participating in the study would view their picture and profile and decide whether they wanted to meet the participant. During the test session on a subsequent day, participants were told that each of the 30 children they had previously rated had also seen the participant's photo and profile and decided whether they wanted to meet the participant. Participants were then told that they would learn which of these children wanted to meet them. Trained experimenters delivered feedback about how the participants were ostensibly rated by other children in several phases. The photos of the 30 other children were arranged on two boards, one green and one red. The 10 photos of children that the participant wanted to meet were placed on the green board, and the 20 photos of children the participant did not want to meet were placed on a red board. Children were told that each photo would be moved to a set of two new boards, one green and one red. Photos moved to the green board were children who wanted to meet the participant; photos moved to the red board were children who did not want to meet the participant. First, the experimenter delivered feedback about 5 of the 10 children the participant wanted to meet. Each of these photos were moved to the red board, indicating that these children did not want to meet the participant. Next, the experimenter delivered feedback about 10 of the 20 children the participant did not want to meet. Half of the photos were moved to the green board, and half were moved to the red board. These two rounds were then repeated for the remaining 5 children the participant wanted to meet, followed by the remaining 10 children the participant did not want to meet. Throughout the feedback phase, evaluators viewed a piece of paper on a clipboard before moving each photo to appear as though they were reading the responses of each of the 30 children about the participant. Physiological responses were recorded during the 2-min periods when experimenters provided feedback about the 10 children who the participant wanted to meet (and who, ostensibly, were not interested in meeting the participant). Participants then completed a 5-min recovery period, completed a brief affect questionnaire, and provided a second saliva sample.

Next, participants completed the TSST, which involves three periods. Participants were first told that they would be delivering a speech in front of teachers who would judge their performance. They were then given 5 min to prepare their speech. Participants were also told that their speech would be videotaped and evaluated by additional experts at a later time. Participants were asked to talk about the qualities of a good friend and which of those characteristics they did and did not possess. Next, participants delivered a 5-min speech in front of two evaluators. Evaluators were trained to provide neutral and mildly negative feedback (e.g., appearing bored) during the speech. If participants

were unable to speak for the full 5 min, they were first prompted to continue speaking. If they were again unable to continue, the evaluators asked a series of standardized questions (e.g., "what makes you a particularly good friend?") until the 5 minutes was completed. Finally, participants completed a mental subtraction task out loud in front of the evaluators for 5 min. Specifically, participants were asked to count backwards in steps of seven from a three-digit number and were stopped and asked to start again each time they made a mistake. If participants were unable to do the mental subtraction (i.e., did not get more than two answers correct within the first minute), the experimenters gave them an easier mental subtraction task involving counting backwards by three from a smaller number. After the TSST, participants completed another 5-min recovery period and provided a third saliva sample.

Finally, participants completed a frustration task. They were told that they would be playing a game in which a number appeared on a computer screen, and that they needed to press that same number on the keyboard as quickly as possible. Correct responses provided within the time allowed for a response were followed by a green smiling face and a positive noise; incorrect responses and those that occurred outside the allowable time window were followed by red frowning face and an irritating noise. The task had two distinct phases, each lasting 5 min. During the training phase, participants were given accurate feedback about their performance and had an 800-ms window in which to provide a response. During the test phase, participants had a shortened window in which to respond (700 ms) and received inaccurate feedback about their performance on 30% of trials (i.e., correct responses were given feedback indicating an inaccurate response). Together, this resulted in a high proportion of feedback indicating incorrect responses during the test phase. Following the frustration task, participants provided a fourth saliva sample. The final saliva sample was taken 20 min following the fourth saliva sample.

**Physiological Data Scoring.** ECG and ICG data were scored by raters unaware of group status. Signals were averaged into 1-min epochs by using Mindware Software (Mindware Technologies). ECG data were scored to provide measures of HR and RSA, a pure measure of parasympathetic nervous system activation. PEP, a measure of SNS activation representing the amount of time that elapses from the beginning of ventricular depolarization to the opening of the aortic valve (electrical systole), was calculated based on the ECG and ICG signals. The Q onset in the ECG and the B onset in the ICG were placed using validated automated scoring algorithms (2, 3) that were visually inspected to ensure accurate placement and adjusted if needed. Stroke volume (SV) was estimated from the  $dz/dt$  signal, providing an estimate of the amount of blood ejected from the heart on each cardiac cycle (4).

**Sensitivity of Cortisol and DHEA-S Assays.** The standard range of cortisol values that can be detected with the cortisol immunoassay used here is 0–110 nmol/L. The standard range of DHEA-S values that can be detected with the immunoassays is 0–12 ng/mL. The range of cortisol and DHEA-S was within the sensitivity bounds for the immunoassays used to assay these markers. The range of cortisol values in our sample was 1.37–18.77 nmol/L at baseline, 2.09–25.29 nmol/L at the second saliva assessment (postpeer-evaluation task), 2.19–39.35 nmol/L at the third saliva assessment (post-TSST), 1.89–28.37 nmol/L at the fourth saliva assessment (postfrustration task), and 2.07–19.36 nmol/L at the fifth saliva assessment (recovery). The range of values for

DHEA-S in our sample was 0.24–9.46 ng/mL at baseline, 0.19–10.1 ng/mL at the second saliva assessment (postpeer evaluation task), 0.22–11.70 ng/mL at the third saliva assessment (post-TSST), 0.20–11.90 at the fourth saliva assessment (postfrustration task), and 0.23–10.70 at the fifth saliva assessment (recovery).

As noted in *Laboratory-Based Tasks* above, our saliva samples were taken ~20 min following the part of each task that was

associated with peak physiological and emotional reactivity (the second round of peer rejection in the peer evaluation task, the speech portion of the TSST, and the beginning of test phase of the frustration task). Evidence suggests that cortisol values peak ~20–25 min following a stressor (5) and, as such, it is possible that our saliva assessments missed the peak cortisol concentration following each task.

1. Howarth GZ, Guyer AE, Pérez-Edgar K (2013) Young children's affective responses to acceptance and rejection by peers: A computer-based task sensitive to variation in temperamental shyness and gender. *Soc Dev* 22(1):146–162.
2. Berntson GG, Lozano DL, Chen Y-J, Cacioppo JT (2004) Where to Q in PEP. *Psychophysiology* 41(2):333–337.
3. Lozano DL, et al. (2007) Where to B in dZ/dt. *Psychophysiology* 44(1):113–119.

4. Sherwood A, et al. (1990) Methodological guidelines for impedance cardiography. *Psychophysiology* 27(1):1–23.
5. Kirschbaum C, Pirke K-M, Hellhammer DH (1993) The 'Trier Social Stress Test'—a tool for investigating psychobiological stress responses in a laboratory setting. *Neuropsychobiology* 28(1-2):76–81.

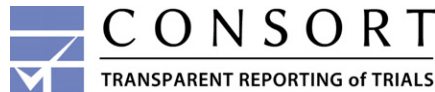

### BEIP: Placement at Age 12

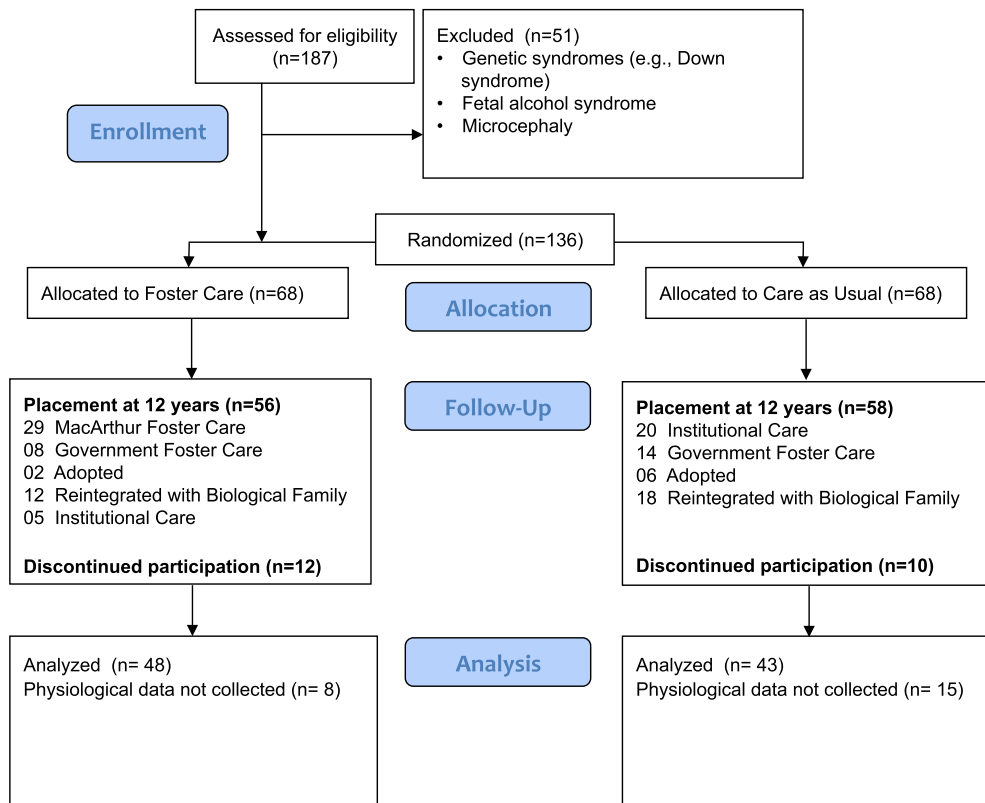

Fig. S1. CONSORT diagram for BEIP. Figure describes the enrollment, randomization, assessment, and analysis of children involved in the randomized controlled trial. Typically developing children in NIG were not part of the randomized controlled trial and, thus, are not included in the figure.

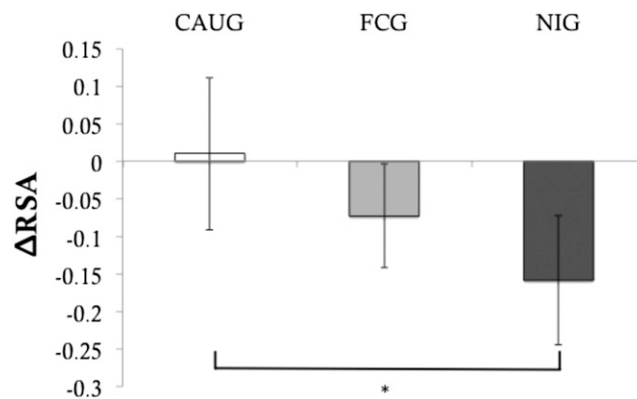

**Fig. S2.** Group differences in ANS reactivity to frustration. Figure depicts changes in respiratory sinus arrhythmia from the training phase to the test phase of the frustration task. \* $P < 0.05$ , two-sided test.

**Table S1.** ANS values at baseline and during each task by group

| ANS measure               | CAUG   |         | FCG    |         | NIG    |         | Group difference |         |
|---------------------------|--------|---------|--------|---------|--------|---------|------------------|---------|
|                           | M      | SD      | M      | SD      | M      | SD      | F                | P value |
| <b>Baseline</b>           |        |         |        |         |        |         |                  |         |
| HR                        | 83.34  | (13.36) | 78.57  | (12.63) | 81.81  | (10.51) | 1.84             | 0.16    |
| SBP                       | 111.04 | (9.98)  | 112.76 | (8.81)  | 108.28 | (7.42)  | 3.12*            | 0.047   |
| DBP                       | 57.14  | (6.23)  | 57.57  | (5.72)  | 56.64  | (5.19)  | 0.30             | 0.74    |
| RSA                       | 6.45   | (1.13)  | 6.72   | (1.05)  | 6.46   | (1.08)  | 0.95             | 0.39    |
| PEP                       | 93.40  | (9.94)  | 100.70 | (9.84)  | 101.57 | (7.63)  | 10.61*           | <0.001  |
| <b>Peer evaluation</b>    |        |         |        |         |        |         |                  |         |
| HR                        | 86.92  | (13.07) | 82.16  | (11.87) | 86.78  | (11.08) | 2.36             | 0.099   |
| SBP                       | 111.50 | (8.25)  | 115.98 | (10.04) | 113.86 | (9.69)  | 2.41             | 0.094   |
| DBP                       | 57.86  | (5.67)  | 60.97  | (7.05)  | 61.22  | (6.20)  | 3.50*            | 0.033   |
| RSA                       | 6.19   | (1.03)  | 6.50   | (0.90)  | 6.29   | (0.95)  | 1.46             | 0.24    |
| PEP                       | 93.17  | (9.90)  | 99.66  | (9.74)  | 98.72  | (8.89)  | 5.96*            | 0.003   |
| <b>Speech preparation</b> |        |         |        |         |        |         |                  |         |
| HR                        | 89.85  | (13.38) | 86.76  | (14.47) | 91.29  | (12.10) | 1.31             | 0.27    |
| SBP                       | 116.71 | (11.87) | 119.60 | (14.08) | 116.42 | (8.92)  | 0.92             | 0.40    |
| DBP                       | 59.81  | (8.12)  | 64.09  | (7.31)  | 62.42  | (7.81)  | 3.02             | 0.052   |
| RSA                       | 6.29   | (1.04)  | 6.53   | (0.93)  | 6.40   | (0.94)  | 0.69             | 0.50    |
| PEP                       | 92.03  | (10.18) | 97.60  | (10.93) | 97.88  | (8.63)  | 4.61*            | 0.012   |
| <b>Speech</b>             |        |         |        |         |        |         |                  |         |
| HR                        | 91.96  | (12.43) | 90.92  | (15.84) | 98.37  | (15.24) | 3.18*            | 0.045   |
| SBP                       | 121.84 | (15.86) | 123.53 | (12.35) | 129.34 | (12.31) | 3.07*            | 0.050   |
| DBP                       | 60.82  | (10.04) | 63.19  | (9.49)  | 69.43  | (9.19)  | 7.47*            | <0.001  |
| RSA                       | 6.38   | (0.90)  | 6.61   | (0.85)  | 6.40   | (1.08)  | 0.79             | 0.45    |
| PEP                       | 90.82  | (9.85)  | 95.64  | (12.73) | 93.24  | (10.63) | 1.94             | 0.15    |
| <b>Math</b>               |        |         |        |         |        |         |                  |         |
| HR                        | 91.64  | (12.05) | 90.57  | (16.57) | 99.58  | (17.87) | 4.47*            | 0.013   |
| SBP                       | 121.07 | (10.94) | 124.27 | (14.01) | 130.02 | (10.93) | 5.55*            | 0.005   |
| DBP                       | 62.04  | (8.40)  | 65.00  | (9.57)  | 68.50  | (8.79)  | 4.85*            | 0.010   |
| RSA                       | 6.33   | (0.95)  | 6.53   | (0.97)  | 6.28   | (1.27)  | 0.69             | 0.50    |
| PEP                       | 91.68  | (9.95)  | 96.75  | (12.16) | 92.31  | (10.19) | 2.83             | 0.063   |
| <b>Frustration</b>        |        |         |        |         |        |         |                  |         |
| HR                        | 86.93  | (11.70) | 82.01  | (12.24) | 86.53  | (10.57) | 2.58             | 0.079   |
| SBP                       | 114.44 | (10.75) | 117.02 | (11.12) | 114.50 | (10.07) | 0.57             | 0.57    |
| DBP                       | 55.41  | (9.19)  | 59.66  | (8.90)  | 58.94  | (7.54)  | 2.01             | 0.14    |
| RSA                       | 5.85   | (1.04)  | 6.33   | (1.05)  | 5.86   | (1.11)  | 3.11*            | 0.048   |
| PEP                       | 94.52  | (9.77)  | 101.87 | (8.70)  | 101.67 | (7.01)  | 10.33*           | <0.001  |

Table depicts raw values of ANS measures at baseline and during each task. CAUG, care-as-usual group; DBP, diastolic blood pressure; FCG, foster care group; HR, heart rate; M, mean; NIG, never institutionalized group; PEP, pre-ejection period; RSA, respiratory sinus arrhythmia; SBP, systolic blood pressure. \* $P < 0.05$ , two-sided test.

**Table S2. HPA axis values at baseline and during each task by group**

| HPA axis measure                | CAUG |        | FCG  |        | NIG   |        | Group difference |         |
|---------------------------------|------|--------|------|--------|-------|--------|------------------|---------|
|                                 | M    | SD     | M    | SD     | M     | SD     | F                | P value |
| <b>Baseline</b>                 |      |        |      |        |       |        |                  |         |
| Cortisol                        | 7.08 | (3.61) | 6.08 | (3.62) | 6.86  | (3.85) | 1.00             | 0.37    |
| DHEA-S                          | 2.43 | (1.57) | 2.18 | (1.83) | 2.80  | (2.10) | 1.36             | 0.26    |
| <b>Peer evaluation</b>          |      |        |      |        |       |        |                  |         |
| Cortisol                        | 7.16 | (4.67) | 5.45 | (2.38) | 6.26  | (3.02) | 4.54*            | 0.012   |
| DHEA-S                          | 3.07 | (2.15) | 2.45 | (2.12) | 2.86  | (2.10) | 1.36             | 0.26    |
| <b>Trier Social Stress Test</b> |      |        |      |        |       |        |                  |         |
| Cortisol                        | 7.92 | (3.90) | 8.36 | (6.61) | 11.30 | (5.57) | 5.07*            | 0.008   |
| DHEA-S                          | 3.13 | (2.23) | 2.53 | (1.16) | 2.92  | (2.35) | 0.84             | 0.43    |
| <b>Frustration</b>              |      |        |      |        |       |        |                  |         |
| Cortisol                        | 7.13 | (3.18) | 7.55 | (5.57) | 10.80 | (5.51) | 6.67*            | 0.002   |
| DHEA-S                          | 3.01 | (2.14) | 2.60 | (1.30) | 2.96  | (2.39) | 0.43             | 0.65    |
| <b>Recovery</b>                 |      |        |      |        |       |        |                  |         |
| Cortisol                        | 6.60 | (2.84) | 6.35 | (3.96) | 8.19  | (3.84) | 2.47             | 0.088   |
| DHEA-S                          | 2.85 | (1.86) | 2.54 | (1.29) | 2.87  | (2.15) | 0.31             | 0.74    |

Table depicts raw values of HPA axis measures at baseline and following each task. CAUG, care-as-usual group; DBP, diastolic blood pressure; FCG, foster care group; HR, heart rate; M, mean; NIG, never institutionalized group. \* $P < 0.05$ , two-sided test

**Table S3. ANS reactivity scores by group**

| ANS measure               | CAUG  |         | FCG   |         | NIG    |         | Group difference <sup>†</sup> |         |
|---------------------------|-------|---------|-------|---------|--------|---------|-------------------------------|---------|
|                           | M     | SD      | M     | SD      | M      | SD      | F                             | P value |
| <b>Peer evaluation</b>    |       |         |       |         |        |         |                               |         |
| HR                        | 3.58  | (4.03)  | 3.37  | (3.50)  | 4.96   | (4.41)  | 2.00                          | 0.140   |
| SBP                       | 1.78  | (4.84)  | 3.17  | (8.27)  | 6.01   | (8.22)  | 3.29*                         | 0.040   |
| DBP                       | 1.06  | (4.86)  | 3.37  | (5.47)  | 4.94   | (5.88)  | 4.82*                         | 0.010   |
| RSA                       | -0.25 | (0.47)  | -0.21 | (0.56)  | -0.17  | (0.53)  | 0.41                          | 0.66    |
| PEP                       | -0.50 | (2.41)  | -1.25 | (2.84)  | -2.85  | (4.61)  | 5.18*                         | 0.007   |
| <b>Speech preparation</b> |       |         |       |         |        |         |                               |         |
| HR                        | 4.50  | (5.32)  | 6.83  | (9.31)  | 7.85   | (6.74)  | 2.11                          | 0.126   |
| SBP                       | 7.58  | (11.75) | 7.20  | (10.88) | 9.53   | (10.33) | 0.55                          | 0.58    |
| DBP                       | 3.09  | (7.82)  | 6.69  | (8.24)  | 7.64   | (9.08)  | 3.07*                         | 0.050   |
| RSA                       | 0.08  | (0.80)  | -0.12 | (1.09)  | -0.01  | (0.88)  | 0.48                          | 0.62    |
| PEP                       | -1.37 | (3.07)  | -2.53 | (5.75)  | -4.43  | (5.35)  | 3.73*                         | 0.027   |
| <b>Speech</b>             |       |         |       |         |        |         |                               |         |
| HR                        | 12.07 | (8.03)  | 16.74 | (12.65) | 23.03  | (15.01) | 7.65*                         | <0.001  |
| SBP                       | 11.99 | (14.86) | 15.14 | (11.82) | 24.24  | (15.28) | 7.13*                         | <0.001  |
| DBP                       | 2.70  | (10.35) | 7.53  | (10.28) | 14.95  | (13.11) | 10.82*                        | <0.001  |
| RSA                       | -0.03 | (0.83)  | -0.11 | (0.99)  | -0.13  | (1.18)  | 0.08                          | 0.92    |
| PEP                       | -4.23 | (5.82)  | -7.56 | (8.00)  | -13.39 | (10.42) | 11.58*                        | <0.001  |
| <b>Math</b>               |       |         |       |         |        |         |                               |         |
| HR                        | 8.64  | (7.77)  | 12.84 | (14.65) | 18.65  | (13.10) | 6.54*                         | 0.002   |
| SBP                       | 12.00 | (15.05) | 13.80 | (12.62) | 21.92  | (11.54) | 5.73*                         | 0.004   |
| DBP                       | 5.59  | (8.49)  | 9.56  | (8.40)  | 14.37  | (7.53)  | 10.63*                        | <0.001  |
| RSA                       | -0.11 | (0.84)  | -0.15 | (1.03)  | -0.17  | (1.01)  | 0.02                          | 0.98    |
| PEP                       | -2.10 | (5.57)  | -5.52 | (8.21)  | -10.85 | (10.31) | 11.31*                        | <0.001  |
| <b>Frustration</b>        |       |         |       |         |        |         |                               |         |
| HR                        | 1.29  | (2.40)  | 0.86  | (2.00)  | 1.88   | (2.00)  | 2.79                          | 0.065   |
| SBP                       | -1.17 | (5.75)  | -2.40 | (11.56) | -1.70  | (10.46) | 0.10                          | 0.90    |
| DBP                       | -7.10 | (5.15)  | -3.96 | (7.16)  | -4.50  | (7.38)  | 1.34                          | 0.27    |
| RSA                       | 0.09  | (0.46)  | 0.02  | (0.34)  | -0.15  | (0.45)  | 4.13*                         | 0.018   |
| PEP                       | 0.53  | (1.39)  | 0.28  | (1.84)  | 0.15   | (1.48)  | 0.57                          | 0.57    |

Table depicts reactivity scores of ANS measures during each task. CAUG, care-as-usual group; DBP, diastolic blood pressure; FCG, foster care group; HR, heart rate; M, mean; NIG, never institutionalized group; PEP, pre-ejection period; RSA, respiratory sinus arrhythmia; SBP, systolic blood pressure. \* $P < 0.05$ , two-sided test.

<sup>†</sup>Analysis controls for sex.

**Table S4. Results of multilevel models examining cortisol and DHEA-S across the study session**

| HPA axis parameters         | Parameter estimate | SE     | t value | P value |
|-----------------------------|--------------------|--------|---------|---------|
| <b>Cortisol<sup>†</sup></b> |                    |        |         |         |
| Intercept                   |                    |        |         |         |
| CAUG vs. FCG                | -0.04              | (0.05) | -0.83   | 0.40    |
| CAUG vs. NIG                | 1.0                | (0.05) | 1.95    | 0.053   |
| FCG vs. NIG                 | 0.13               | (0.05) | 2.76*   | 0.006   |
| Slope                       |                    |        |         |         |
| CAUG vs. FCG                | 0.08               | (0.03) | 2.43*   | 0.016   |
| CAUG vs. NIG                | 0.16               | (0.03) | 5.34*   | <0.001  |
| FCG vs. NIG                 | 0.08               | (0.03) | 2.74*   | 0.006   |
| <b>DHEA-S<sup>‡</sup></b>   |                    |        |         |         |
| Intercept                   |                    |        |         |         |
| CAUG vs. FCG                | -0.07              | (0.07) | -1.05   | 0.30    |
| CAUG vs. NIG                | -0.08              | (0.07) | -1.20   | 0.23    |
| FCG vs. NIG                 | -0.01              | (0.06) | -0.15   | 0.88    |
| Slope                       |                    |        |         |         |
| CAUG vs. FCG                | 0.01               | (0.01) | 0.65    | 0.52    |
| CAUG vs. NIG                | -0.01              | (0.01) | -0.31   | 0.76    |
| FCG vs. NIG                 | -0.01              | (0.01) | -0.94   | 0.35    |

\* $P < 0.05$ , two-sided test.

<sup>†</sup>Cortisol values were skewed and log-transformed before analysis. The best-fitting model included linear, quadratic, and cubic effects for time. The intercept and linear slope of cortisol were modeled as random effects; the quadratic and cubic terms were modeled as fixed effects. Group effects were tested with linear contrasts between groups as specified above; group effects were included on the intercept and linear, quadratic, and cubic changes across time.

<sup>‡</sup>DHEA-S values were skewed and log-transformed before analysis. The best-fitting model included linear and quadratic effects for time. The intercept and both linear and quadratic effects of time on DHEA-S were modeled as random effects. Group effects were tested with linear contrasts between groups as specified above; group effects were included on the intercept and both linear and quadratic changes across time.
